# Supplementary material for: Incorporation of a FRET Pair into a Riboswitch RNA to Measure Mg2+ Concentration and RNA Conformational Change in Cell
Source: MDPI journal article supplement (doi:10.3390/ijms23031493), 2022-01-27
Supplement: s1 [file s1]

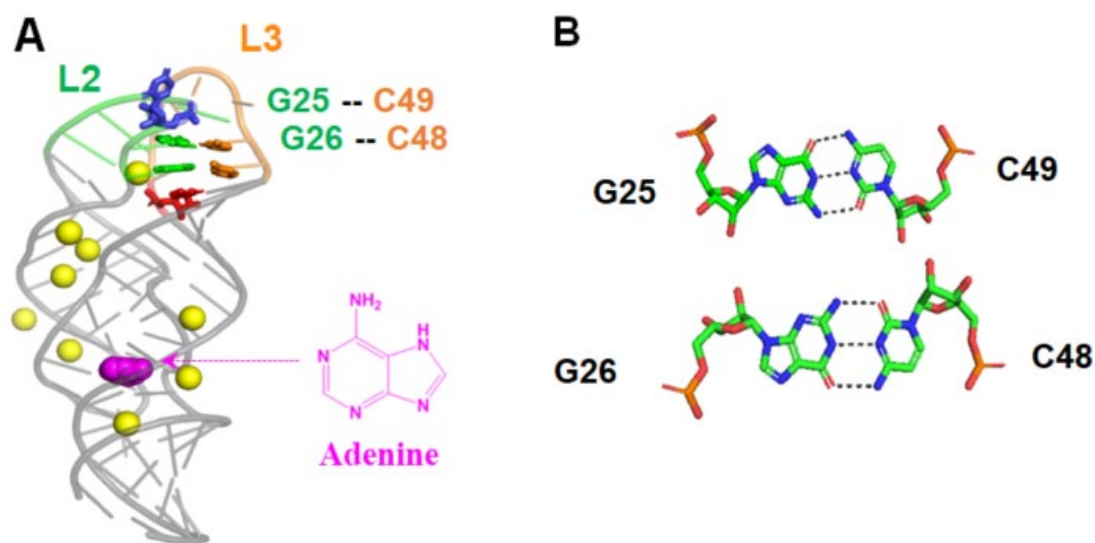

**Supplementary Figure S1.** (A) The crystal structure of the aptamer domain of adenine riboswitch at the presence of adenine (PDB ID: 4TZX). A kissing loop (KL) with two base-pairs, G25-C49 and G26-C48 is formed between L2 (green) and L3 (orange). (B) The hydrogen bonds of G25-C49 and G26-C48. Base pairings are indicated with dashed lines. The carbon, nitrogen, oxygen and phosphate atoms are colored in green, blue, red and orange, respectively.

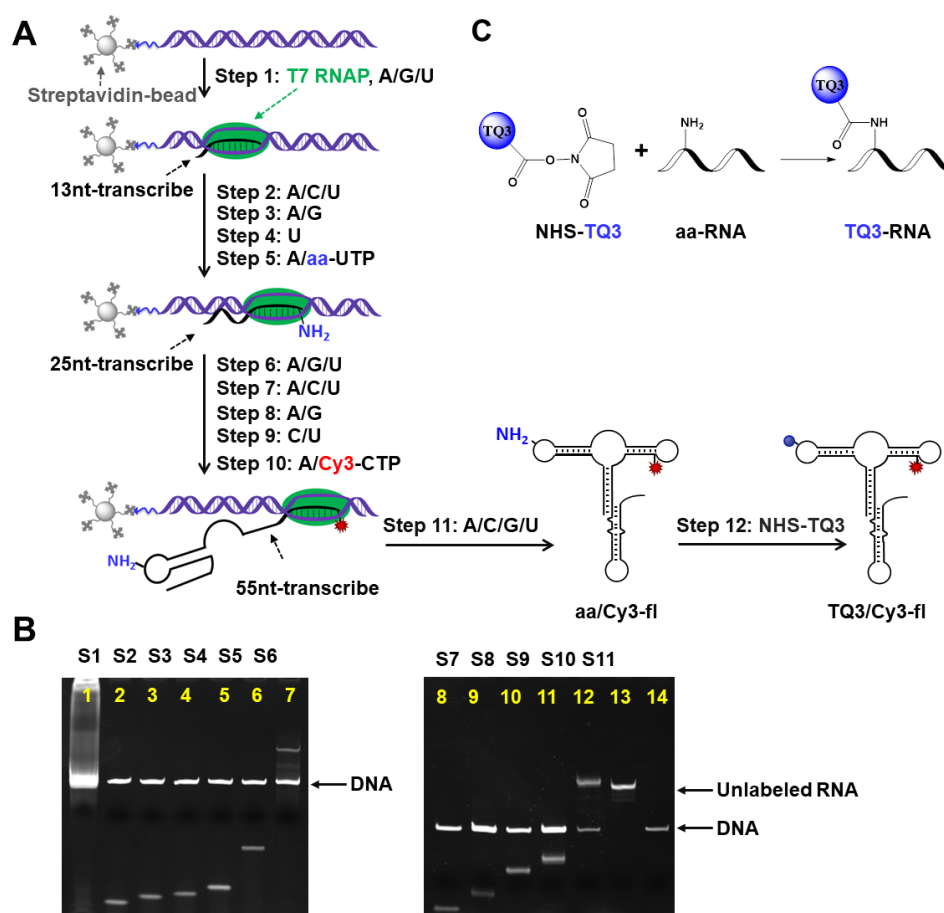

**Supplementary Figure S2.** Diagram of aa/Cy3 and TQ3/Cy3-fl synthesis by PLOR and a conjugation reaction. (A) PLOR reaction (steps 1-11) was applied to produce aa/Cy3-fl, which was specifically labeled with aa and Cy3 group at sites 24 and 55, respectively. The conjugation reaction (step 12) between aa/Cy3-fl and NHS-TQ3 was performed after PLOR to generate TQ3/Cy3-fl. aa, Cy3 and TQ3 groups are shown as NH<sub>2</sub> (blue), sparkle (red), and sphere (blue), respectively. The biotin-labeled double-stranded DNA (purple) was attached to the streptavidin-coated agarose beads (gray) and used as the solid-phase DNA template in PLOR. (B) 12% denaturing PAGE of products at individual step in PLOR. The eluents at steps 1 to 11 were loaded at lanes 1-6 and 8-12. The double-stranded DNA templates were loaded at lanes 7 and 14, and unlabeled full-length RNA was loaded at lane 13 as standard samples. (C) The conjugation reaction between aa-RNA and NHS-TQ3 to obtain the TQ3-RNA.

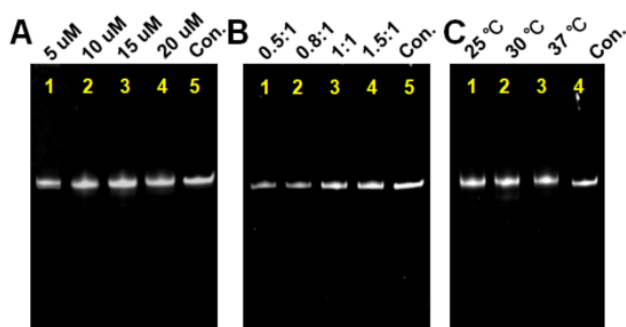

**Supplementary Figure S3.** Optimization of PLOR synthesis for aa/Cy3-fl. (A) The DNA concentrations are 5 (Lane 1), 10 (Lane 2), 15 (Lane 3) and 20  $\mu$ M (Lane 4), respectively. Unlabeled fl was loaded at Lane 5 as control. (B) Optimization of the ratios between T7 RNAP and DNA template. The ratios are 0.5:1 (Lane 1), 0.8:1 (Lane 2), 1:1 (Lane 3), and 1.5:1 (Lane 4). Unlabeled fl was loaded at Lane 5 as control. (C) Optimization of reaction temperatures at step 10 for Cy3-CTP incorporation. The reaction temperatures are 25  $^{\circ}$ C (Lane 1), 30  $^{\circ}$ C (Lane 2), and 37  $^{\circ}$ C (Lane 3). Unlabeled fl was loaded at Lane 4 as control.

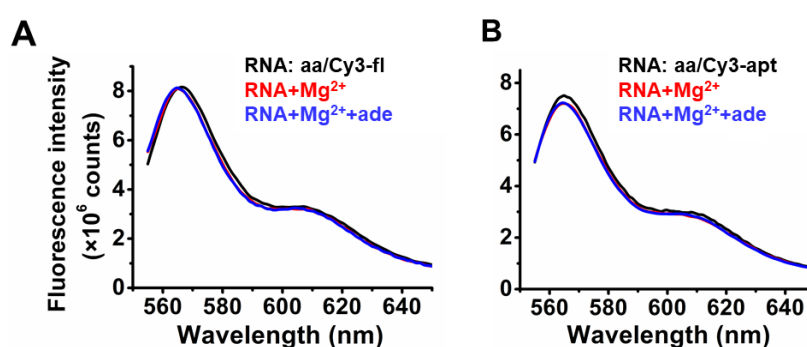

**Supplementary Figure S4.** Steady state fluorescence detection of aa/Cy3-fl and apt response to  $Mg^{2+}$  and adenine. (A) Fluorescence spectra of aa/Cy3-fl (black), aa/Cy3-fl with 2 mM  $Mg^{2+}$  (red) and aa/Cy3-fl with 0.1 mM adenine (blue). The 0.1 mM adenine was titrated to the RNA premixed with 2mM  $Mg^{2+}$  (blue). (B) Fluorescence spectra of aa/Cy3-apt (black), aa/Cy3-apt with 2 mM  $Mg^{2+}$  (red) and aa/Cy3-apt with 0.1 mM adenine (blue). The 0.1 mM adenine was titrated to the RNA premixed with 2mM  $Mg^{2+}$  (blue). Each spectrum was replicated 3 times, fluorescence intensity values were means  $\pm$  standard deviations of triplicate experiments.

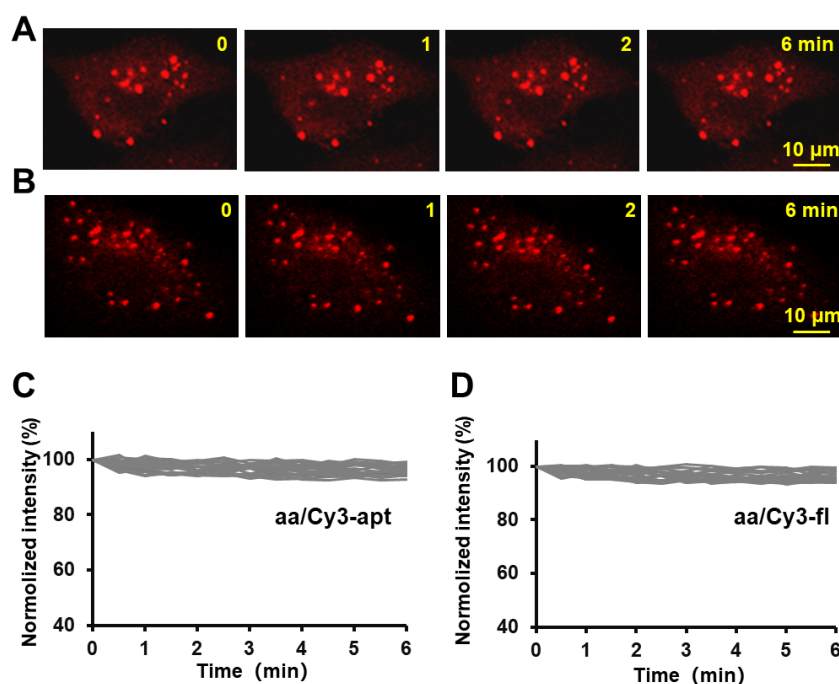

**Supplementary Figure S5.** Cellular conformational distribution of aa/Cy3-apt and fl based on fluorescence decrease induced by adenine. Time course confocal imaging of aa/Cy3-apt (A) or aa/Cy3-fl (B) in live A549 cell after the adenine addition. Time course of fluorescence decrease of multiple aa/Cy3-apt foci (C) or aa/Cy3-fl foci (D) in live cells induced by adenine. The fluorescence intensities of RNA foci from different cells were measured in 30 s intervals up to 6 min post adenine addition.

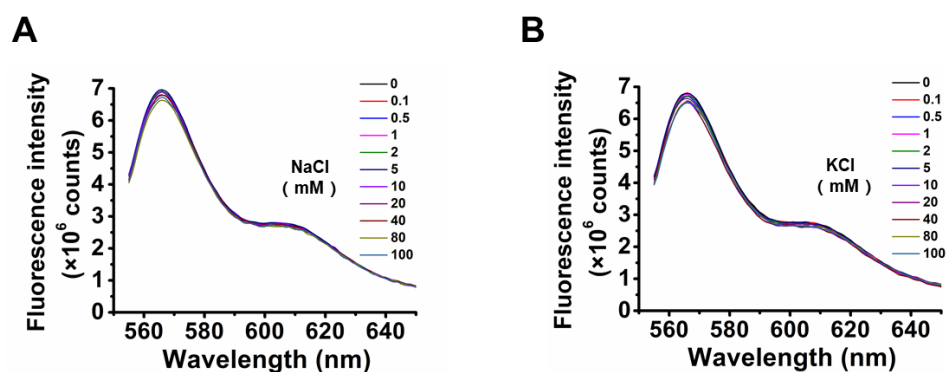

**Supplementary Figure S6.** Steady-state fluorescence response of TQ3/Cy3-apt to monovalent metal ions. (A) Steady-state fluorescence spectra of TQ3/Cy3-apt with the addition of 0.1–100 mM  $\text{Na}^+$ . (B) Steady-state fluorescence spectra of TQ3/Cy3-fl with the addition of 0.1–100 mM  $\text{K}^+$ . Each spectrum was replicated 3 times, fluorescence intensity values were means  $\pm$  standard deviations of triplicate experiments.

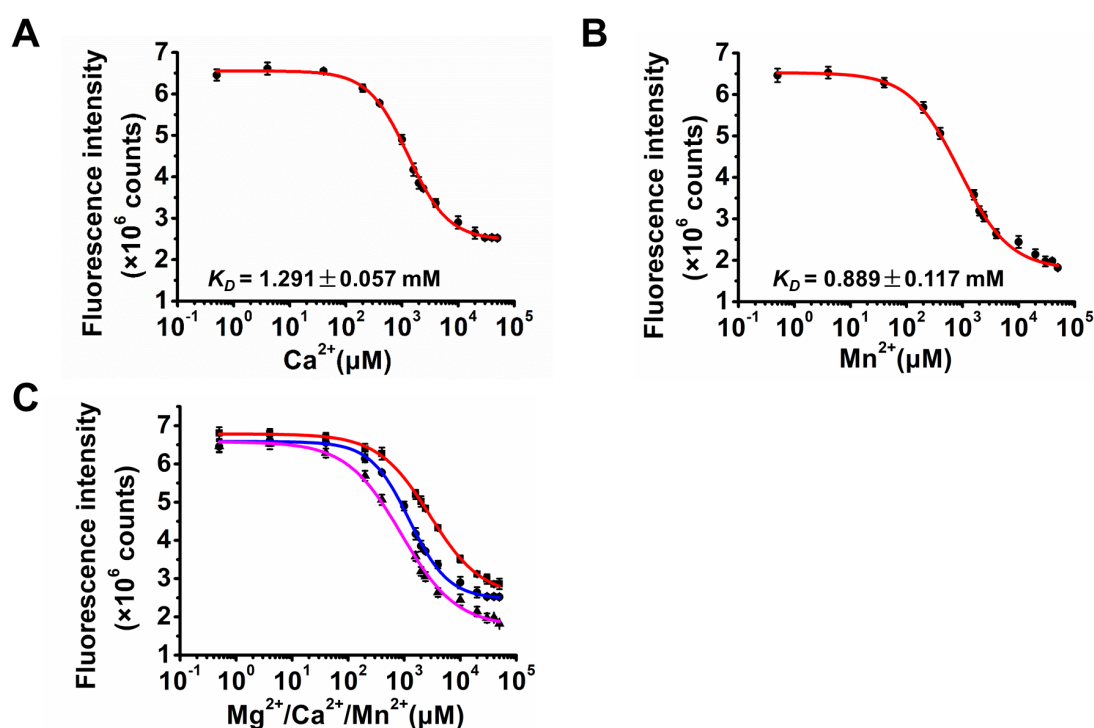

**Supplementary Figure S7.** Steady-state fluorescence response of TQ3/Cy3-apt to divalent metal ions. (A) Titration curves of  $0.5 \mu\text{M}$ – $50 \text{ mM}$   $\text{Ca}^{2+}$  to TQ3/Cy3-apt. (B) Titration curves of  $0.5 \mu\text{M}$ – $50 \text{ mM}$   $\text{Mn}^{2+}$  to TQ3/Cy3-apt. (C) Superposition of titration curves of  $\text{Mn}^{2+}$  (magenta),  $\text{Ca}^{2+}$  (blue) and  $\text{Mg}^{2+}$  (red) to TQ3/Cy3-apt. Each curve was replicated 3 times, fluorescence intensity values were means  $\pm$  standard deviations of triplicate experiments.

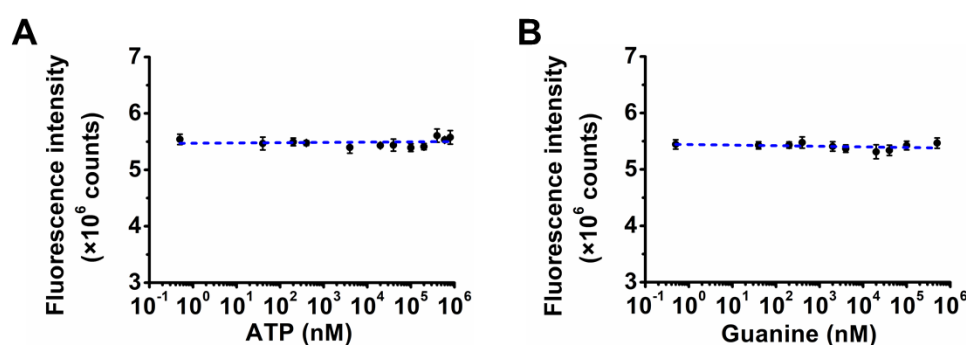

**Supplementary Figure S8.** Steady-state fluorescence response of TQ3/Cy3-fl to ATP (adenosine triphosphate) and guanine. (A) Titration curves of TQ3/Cy3-fl with the addition of  $0.5 \text{ nM}$ – $1 \text{ mM}$  ATP. (A) Titration curves of TQ3/Cy3-fl with the addition of  $0.5 \text{ nM}$ – $1 \text{ mM}$  guanine. Each spectrum was replicated 3 times, fluorescence intensity values were means  $\pm$  standard deviations of triplicate experiments.

**Supplementary Table S1.** The sequences of primers and DNA templates for adenine riboswitch apt and fl.

Underlined is the T7 promoter sequence. Italicized is the linker between biotin and T7 promoter.

| RNA | DNA templates                    | Sequence                                                                                                                                                                                 |
|-----|----------------------------------|------------------------------------------------------------------------------------------------------------------------------------------------------------------------------------------|
| apt | non-template strand              | 5'-biotin-<br><i>TCTGATTCAGCTAGTCCATAATACGACTCACTATAGGGAA</i><br>GATATAATCCTAATGATATGGTTTGGGAGTTTCTACCAA<br>GAGCCTTAAACTCTTGATTATCTTCCC                                                  |
|     | template strand                  | 5'-<br>mGmGGAAGATAATCAAGAGTTTAAGGCTCTTGGTAGAA<br>ACTCCCAAACCATATCATTAGGATTATATCTTCCCTATA<br><i>GTGAGTCGTATTA</i> <i>TGGACTAGCTGAATCAGA</i>                                               |
|     | <b>Primers for PCR</b>           | <b>Sequence</b>                                                                                                                                                                          |
|     | Forward primer<br>Reverse primer | 5'-biotin-TCTGATTCAGCTAGTCCATAATACGACT<br>5'-mGmGGAAGATAATCAAGAGTTTAAGGCTCT                                                                                                              |
| fl  | <b>DNA templates</b>             | <b>Sequence</b>                                                                                                                                                                          |
|     | non-template strand              | 5'-biotin-<br><i>TCTGATTCAGCTAGTCCATAATACGACTCACTATAGGGAA</i><br>GATATAATCCTAATGATATGGTTTGGGAGTTTCTACCAA<br>GAGCCTTAAACTCTTGATTATCTTCTCTGTCGCTTTATCC<br>CAAATTTTATAAAGAGAAGACTCATGAAT    |
|     | template strand                  | 5'-<br>mAmTTCATGAGTCTTCTCTTTATAAAATTTGGGATAAAG<br>CGACAGAGAAGATAATCAAGAGTTTAAGGCTCTTGGTA<br>GAAACTCCCAAACCATATCATTAGGATTATATCTTCCCT<br><i>ATAGTGAGTCGTATTA</i> <i>TGGACTAGCTGAATCAGA</i> |
|     | <b>Primer for PCR</b>            | <b>Sequence</b>                                                                                                                                                                          |
|     | Forward primer<br>Reverse primer | 5'-biotin-TCTGATTCAGCTAGTCCATAATACGACT<br>5'-mAmTTCATGAGTCTTCTCTTTATAAAATTT                                                                                                              |

**Supplementary Table S2.** Reagents usage for 2 mL, 15  $\mu$ M PLOR reaction to generate aa/Cy3-apt and aa/Cy3-fl.

| Component/reaction temperature                       | Concentration |
|------------------------------------------------------|---------------|
| <b>Initiation stage (Step 1), 37°C, 15min</b>        |               |
| DNA beads                                            | 15 $\mu$ M    |
| T7 RNAP                                              | 15 $\mu$ M    |
| ATP                                                  | 1.44 mM       |
| GTP                                                  | 0.96 mM       |
| UTP                                                  | 144 $\mu$ M   |
| <b>Elongation stage (25°C except Step 10, 10min)</b> |               |
| <b>Step 2:</b> ATP,CTP,UTP                           | 30 $\mu$ M    |
| <b>Step 3:</b> ATP, GTP                              | 15 $\mu$ M    |
| <b>Step 4:</b> UTP                                   | 15 $\mu$ M    |
| <b>Step 5:</b> ATP, 5-aminoally UTP                  | 15 $\mu$ M    |
| <b>Step 6:</b> ATP,                                  | 15 $\mu$ M    |
| GTP, UTP                                             | 90 $\mu$ M    |
| <b>Step 7:</b> ATP, CTP                              | 45 $\mu$ M    |
| UTP                                                  | 15 $\mu$ M    |
| <b>Step 8:</b> ATP                                   | 15 $\mu$ M    |
| GTP                                                  | 30 $\mu$ M    |
| <b>Step 9:</b> CTP, UTP                              | 30 $\mu$ M    |
| <b>Step 10 (30°C):</b>                               |               |
| ATP                                                  | 45 $\mu$ M    |
| Cy3-CTP                                              | 15 $\mu$ M    |
| <b>Termination stage (25°C for 10min)</b>            |               |
| <b>Step 11 for aa/Cy3-apt:</b>                       |               |
| ATP                                                  | 30 $\mu$ M    |
| CTP                                                  | 75 $\mu$ M    |
| GTP                                                  | 15 $\mu$ M    |
| UTP                                                  | 120 $\mu$ M   |
| <b>Step 11 for aa/Cy3-fl:</b>                        |               |
| ATP                                                  | 225 $\mu$ M   |
| CTP                                                  | 105 $\mu$ M   |
| GTP                                                  | 90 $\mu$ M    |
| UTP                                                  | 210 $\mu$ M   |

**Supplementary Table S3.**  $K_D$  values of  $Mg^{2+}$  and adenine binding to TQ3/Cy3-apt and TQ3/Cy3-fl.

| RNA         | $Mg^{2+}$            | Adenine<br>(2 mM $Mg^{2+}$ ) | Adenine<br>(50 mM $Mg^{2+}$ ) |
|-------------|----------------------|------------------------------|-------------------------------|
| TQ3/Cy3-apt | $2.871 \pm 0.050$ mM | $61.833 \pm 0.621$ $\mu$ M   | $66.546 \pm 0.987$ $\mu$ M    |
| TQ3/Cy3-fl  | $3.990 \pm 0.078$ mM | $15.826 \pm 0.287$ $\mu$ M   | $13.229 \pm 0.222$ $\mu$ M    |
